# Supplementary material
Source: publisher site journal article supplement (https://www.dovepress.com/article/323026)
Supplement: Supplementary file 1 [file get_supplementary_file.php]

Supplemental data

**
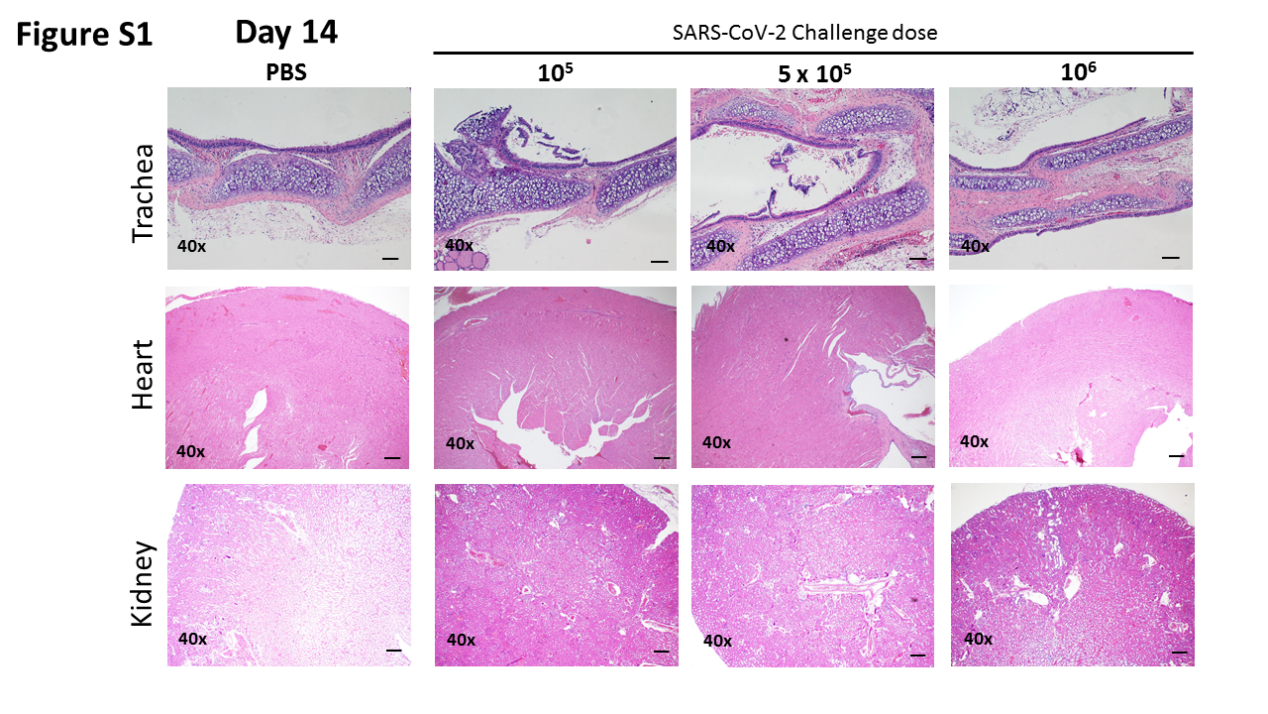
**

**Figure S1. H&E staining of trachea, heart, and kidney post SARS-CoV-2 infection on day 14.** Syrian hamsters aged 6 to 8 weeks (n=5) were infected with 105, 5×105, and 106 TCID50 of SARS-CoV-2 on day 0. On day 14, samples of trachea, heart, and kidney were fixed in formalin and embedded in paraffin using routine methods, and the sections were then stained with hematoxylin and eosin (H&E). Scale bar = 200 µm.

**
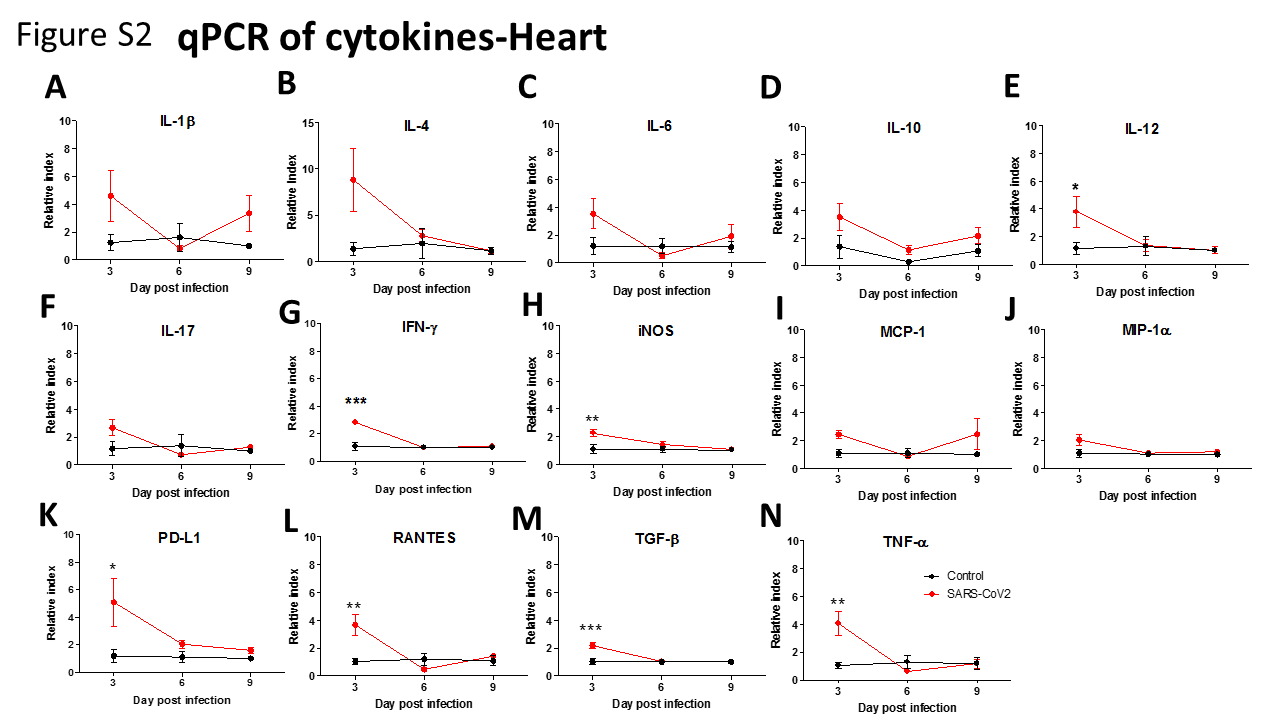
**

**Figure S2. Cytokine expression in heart of SARS-CoV-2-infected hamsters on days 3, 6, and 9 post-infection.** Hamsters infected with 5×105 TCID50 of SARS-CoV-2 (n=5 per group, and non-infected control). On days 3, 6, and 9, the hamsters were sacrificed, heart RNA was extracted, and cytokine gene expression profiles were determined by using qPCR. Relative index is presented as 2-ΔΔCT and the mean ± SEM of the numeric values in each SARS-CoV-2 group is presented below at 3, 6, and 9 d.p.i., respectively. **(A)** IL-1β (4.619±1.831, 0.821±0.205, 3.359±1.293), **(B)** IL-4 (8.829±3.422, 2.764±0.624, 1.135±0.296), **(C)** IL-6 (3.536±1.079, 0.523±0.202, 1.926±0.864), **(D)** IL-10 (3.522±0.948, 1.158±0.335, 2.169±0.505), **(E)** IL-12 (3.788±1.1046, 1.376±0.442, 1.015±0.273), **(F)** IL-17 (2.684±0.579, 0.747±0.074, 1.286±0.152), **(G)** IFN-γ (2.835±0.154, 0.999±0.116, 1.116±0.163), **(H)** iNOS (2.266±0.274, 1.402±0.208, 1.058±0.108), **(I)** MCP-1 (2.445±0.277, 0.859±0.189, 2.463±1.145), **(J)** MIP-1α (2.045±0.418, 1.098±0.082, 1.197±0.182), **(K)** PD-L1 (5.105±1.739, 2.0516±0.292, 1.602±0.235), **(L)** RANTES (3.677±0.748, 0.482±0.0793, 1.425±0.146), **(M)** TGF-β (2.186±0.206, 1.048±0.092, 1.031±0.117), **(N)** TNF-α (4.089±0.866, 0.643±0.161, 1.159±0.328). Differences among groups were determined using two-way ANOVA with a Bonferroni post hoc test in panels **(A-N)** (**P* < 0.05; ***P* < 0.01), no significance among groups is not shown.


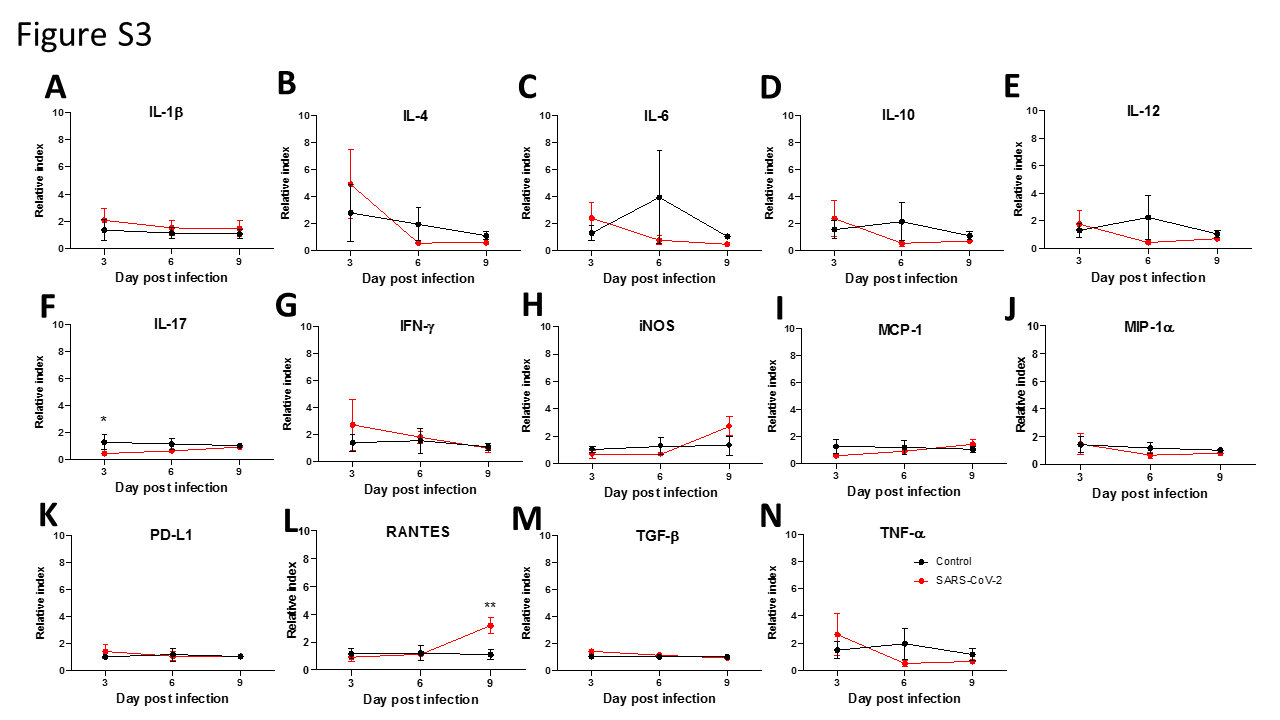


**Figure S3. Cytokine expression in kidney of SARS-CoV-2-infected hamsters on days 3, 6, and 9.** Hamsters were infected with 5×105 TCID50 of SARS-CoV-2 (n=5 per group, and non-infected control). On days 3, 6, and 9, the hamsters were sacrificed, kidney RNA was extracted, and cytokine gene expression profiles were determined by using qPCR. Relative index is presented as 2-ΔΔCT and the mean ± SEM of the numeric values in each SARS-CoV-2 group is presented below at 3, 6, and 9 d.p.i., respectively. **(A)** IL-1β (2.085±0.845, 1.526±0.549, 1.485±0.611), **(B)** IL-4 (4.897±2.568, 0.538±0.089, 0.565±0.150), **(C)** IL-6 (2.384±1.185, 0.748±0.312, 0.450±0.084), **(D)** IL-10 (2.353±1.329, 0.519±0.210, 0.691±0.119), **(E)** IL-12 (1.772±0.955, 0.429±0.1461, 0.708±0.086), **(F)** IL-17 (0.43±0.103, 0.627±0.077, 0.907±0.052), **(G)** IFN-γ (2.701±1.682, 1.791±0.455, 0.972±0.334), **(H)** iNOS (0.678±0.304, 0.694±0.093, 2.736±0.710), **(I)** MCP-1 (0.564±0.165, 0.893±0.128, 1.416±0.327), **(J)** MIP-1α (1.460±0.758, 0.654±0.210, 0.793±0.112), **(K)** PD-L1 (1.397±0.547, 1.043±0.328, 1.044±0.181), **(L)** RANTES (0.918±0.307, 1.126±0.183, 3.199±0.555), **(M)** TGF-β (1.404±0.161, 1.122±0.040, 0.913±0.0634), **(N)** TNF-α (2.625±1.548, 0.498±0.215, 0.645±0.119). Differences among groups were determined using two-way ANOVA with a Bonferroni post hoc test in panels **(A-N)** (**P* < 0.05; ***P* < 0.01), no significance among groups is not shown.


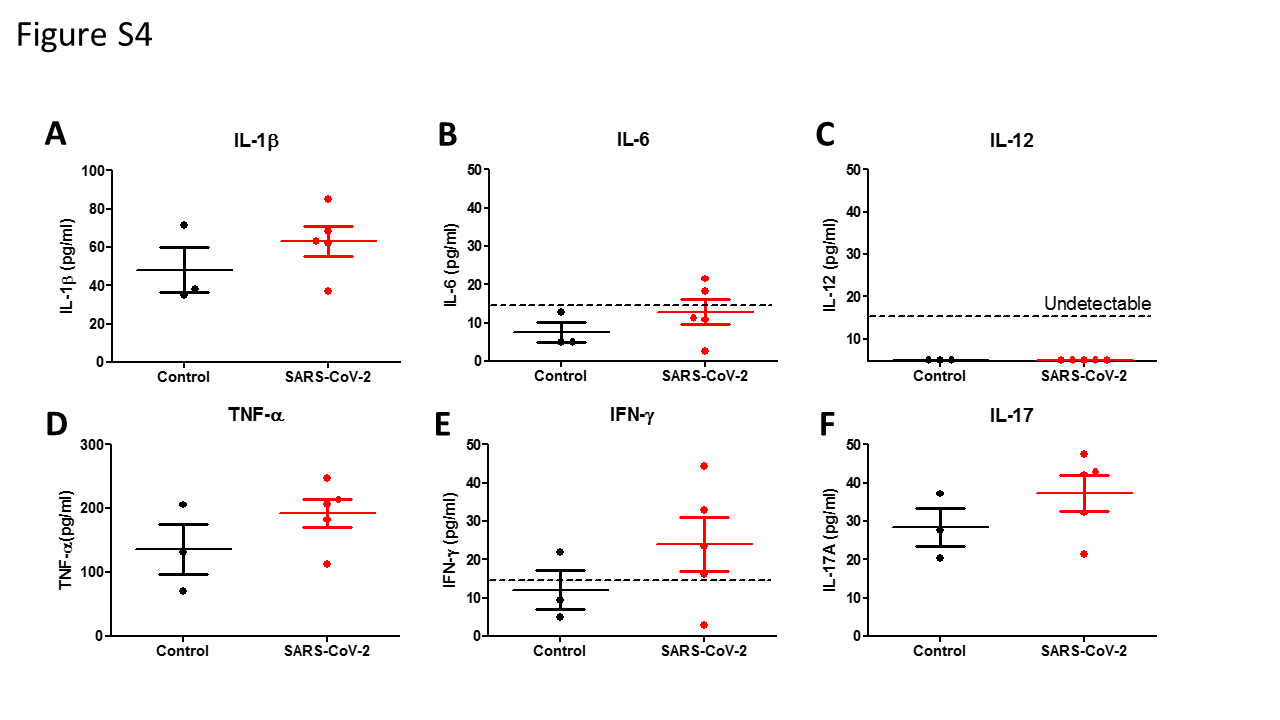


**Figure S4. Blood cytokine and chemokine expression in SARS-CoV-2-infected hamsters on day 3 post-infection.** Hamsters were infected with 5×105 TCID50 of SARS-CoV-2 (n=5 for SARS-CoV-2, and n=3 for non-infected control). On day 3 post-infection, plasma was collected and stored at -80°C until use. The expression levels of cytokines and chemokines were quantified by Multi-Plex immunoassay by the Inflammation Core Facility (Institute of Biomedical Sciences, Academia Sinica, Taiwan). **(A)** IL-1β. **(B)** IL-6. **(C)** IL-12. **(D)** TNF-α. **(E)** IFN-γ. **(F)** IL-17. The dotted lines represent the limit of measurement (undetectable). Differences between two groups were determined using a two-tailed unpaired Student’s *t*-test; however, there is no significance among all groups in panels **(A-F)**.
